# Supplementary material for: Effects of Polyunsaturated Fatty Acids on Nonspecific Typical Dry Eye Disease: A Systematic Review and Meta-Analysis of Randomized Clinical Trials
Source: PubMed Central journal article supplement (PMC6566338; doi:10.3390/nu11050942), 2019-04-26
Supplement: nutrients-11-00942-s001.pdf [file nutrients-11-00942-s001.pdf]

---

# **Effects of polyunsaturated fatty acids on nonspecific typical dry eye disease:**

**A systematic review and meta-analysis of randomized  
clinical trials**

**(Supplemental Materials)**

---

# Supplemental Material

**Supplemental Material 1.** Search strategy

**Supplemental Material 2.** Contents and dosage of polyunsaturated fatty acids

**Supplemental Material 3.** Risk of bias

**Supplemental Material 4.** Sensitivity analysis for high heterogeneity outcome (TBUT)

**Supplemental Material 5.** Small study effect test (TBUT)

**Supplemental Material 6.** Meta-regression of treatment duration on TBUT

**Supplemental Material 7.** Meta-regression of single-eye data on TBUT

**Supplemental Material 8.** Small study effect test (Schirmer's test)

**Supplemental Material 9.** Meta-regression of treatment duration on Schirmer's test score

**Supplemental Material 10.** Meta-regression of single-eye data on Schirmer's test score

**Supplemental Material 11.** Meta-regression of anesthesia on Schirmer's test score

**Supplemental Material 12.** Small study effect test (Osmolarity)

**Supplemental Material 13.** Small study effect test (OSDI score)

**Supplemental Material 14.** Meta-regression of treatment duration on OSDI score

**Supplemental Material 1**  
**Search strategy**

# Supplemental Material 1

## Search strategy

### Primary search steps:

- #1. omega 3
- #2. omega3
- #3. omega-3 fatty acids
- #4. omega-3 fatty acid
- #5. omega3 fatty acids
- #6. omega3 fatty acid
- #7. docosahexaenoic
- #8. dha
- #9. eicosapentaenoic
- #10. epa
- #11. polyunsaturated
- #12. polyunsaturated fatty acids
- #13. polyunsaturated fatty acid
- #14. LCPUFA\*
- #15. PUFA\*
- #16.  $\omega$ -3
- #17.  $\omega$ 3
- #18. n3 fatty acid
- #19. n3 fatty acids
- #20. n-3 fatty acid
- #21. n-3 fatty acids
- #22. omega-6 fatty acids
- #23. omega-6 fatty acid
- #24. omega6 fatty acids
- #25. omega6 fatty acid
- #26. #1 OR #2 OR #3 OR #4 OR #5 OR #6 OR #7 OR #8 OR #9 OR #10 OR #11 OR #12 OR #13  
OR #14 OR #15 OR #16 OR #17 OR #18 OR #19 OR #20 OR #21 OR #22 OR #23 OR #24  
OR #25
- #27. conjunctivitis sicca
- #28. keratoconjunctivitis sicca
- #29. keratitis sicca
- #30. Dry Eye Disease
- #31. Dry eye syndrome
- #32. Dry eye
- #33. cornea xerosis
- #34. corneal xerosis
- #35. xerophthalmia
- #36. #27 OR #28 OR #29 OR #30 OR #31 OR #32 OR #33 OR #34 OR #35
- #37. #26 AND #36

### Final syntax in PubMed (an example):

(omega 3 OR omega3 OR omega-3 fatty acids OR omega-3 fatty acid OR omega3 fatty acids OR omega3 fatty acid OR docosahexaenoic OR dha OR eicosapentaenoic OR epa OR polyunsaturated OR polyunsaturated fatty acids OR polyunsaturated fatty acid OR LCPUFA\* OR PUFA\* OR  $\omega$ -3 OR  $\omega$ 3 OR n3 fatty acid OR n3 fatty acids OR n-3 fatty acid OR n-3 fatty acids OR omega-6 fatty acids OR omega-6 fatty acid OR omega6 fatty acids OR omega6 fatty acid) AND (conjunctivitis sicca OR keratoconjunctivitis sicca OR keratitis sicca OR Dry Eye Disease OR Dry eye syndrome OR Dry eye OR cornea xerosis OR corneal xerosis OR xerophthalmia)

## **Supplemental Material 2**

# **Contents and dosage of polyunsaturated fatty acids**

## Supplemental Material 2

### Contents and dosage of polyunsaturated fatty acids

| Study                                    | Oil type                                             | PUFA dosage (mg/day)                                 |
|------------------------------------------|------------------------------------------------------|------------------------------------------------------|
| <b>Asbell et al.<br/>2018</b>            | Fish oil                                             | EPA2000+DHA1000                                      |
| <b>Barabino et al.<br/>2003</b>          | Medilar tablets                                      | GLA 30+LA57                                          |
| <b>Bhargava et al.<br/>2013</b>          | Not told                                             | EPA650+DHA350                                        |
| <b>Brignole-Baudouin et al.<br/>2011</b> | Medilar<br>(fish oil and borage oil)                 | 427.5EPA+285+DHA+GLA15                               |
| <b>Chinnery et al.<br/>2017</b>          | fish oil                                             | EPA1000+DHA500                                       |
| <b>Creuzot-Garcher et al.<br/>2011</b>   | Nutrilmarm<br>(fish oil and borage oil)              | DHA392+EPA28+<br>GLA82+LA126                         |
| <b>Creuzot-Garcher et al.<br/>2006</b>   | Nutrilmarm<br>(fish oil and borage oil)              | DHA392+EPA28+<br>GLA82+LA126                         |
| <b>Deinema et al.<br/>2017</b>           | Krill oil group                                      | EPA945+DHA510                                        |
| <b>Kangari et al.<br/>2013</b>           | Fish oil and vegetable oil                           | EPA360+DHA240                                        |
| <b>Kawakita et al.<br/>2013</b>          | Fish oil                                             | EPA1245+DHA540                                       |
| <b>Larmo et al.<br/>2010</b>             | Sea Buckthorn Oil                                    | ALA149+ LA245                                        |
| <b>Sheppard et al.<br/>2013</b>          | Hydroeye<br>(Fish oil and black<br>currant seed oil) | EPA126+DHA 99+<br>DPA39+ALA196+<br>GLA240+LA710+ARA3 |
| <b>Wojtowicz et al.<br/>2011</b>         | TheraTears Nutritions<br>(fish oil and flaxseed oil) | EPA450+DHA300+<br>1000 flaxseed oil (rich in ALA)    |

**Supplemental Material 3**  
**Risk of bias**

# Supplemental Material 3

## Risk of bias summary

|                        | Random sequence generation (selection bias) | Allocation concealment (selection bias) | Blinding of participants and personnel (performance bias) | Blinding of outcome assessment (detection bias) | Incomplete outcome data (attrition bias) | Selective reporting (reporting bias) | Other bias |
|------------------------|---------------------------------------------|-----------------------------------------|-----------------------------------------------------------|-------------------------------------------------|------------------------------------------|--------------------------------------|------------|
| Asbell 2018            | +                                           | +                                       | +                                                         | +                                               | +                                        | +                                    | +          |
| Barabino 2003          | ?                                           | ?                                       | +                                                         | ?                                               | +                                        | -                                    | -          |
| Bhargava 2013          | +                                           | +                                       | +                                                         | +                                               | +                                        | +                                    | +          |
| Brignole-Baudouin 2011 | +                                           | +                                       | +                                                         | +                                               | +                                        | -                                    | +          |
| Chinnery 2017          | +                                           | +                                       | +                                                         | +                                               | +                                        | +                                    | ?          |
| Creuzot-Garcher 2006   | ?                                           | ?                                       | +                                                         | ?                                               | +                                        | ?                                    | +          |
| Creuzot-Garcher 2011   | ?                                           | ?                                       | ?                                                         | ?                                               | +                                        | +                                    | ?          |
| Deinema 2017           | +                                           | +                                       | +                                                         | +                                               | +                                        | +                                    | +          |
| Kangari 2013           | +                                           | ?                                       | +                                                         | +                                               | -                                        | +                                    | +          |
| Kawakita 2013          | ?                                           | ?                                       | ?                                                         | ?                                               | +                                        | -                                    | -          |
| Larmo 2010             | ?                                           | ?                                       | +                                                         | +                                               | -                                        | +                                    | -          |
| Sheppard 2013          | +                                           | ?                                       | +                                                         | ?                                               | -                                        | +                                    | +          |
| Wojtowicz 2011         | ?                                           | ?                                       | +                                                         | +                                               | +                                        | -                                    | -          |

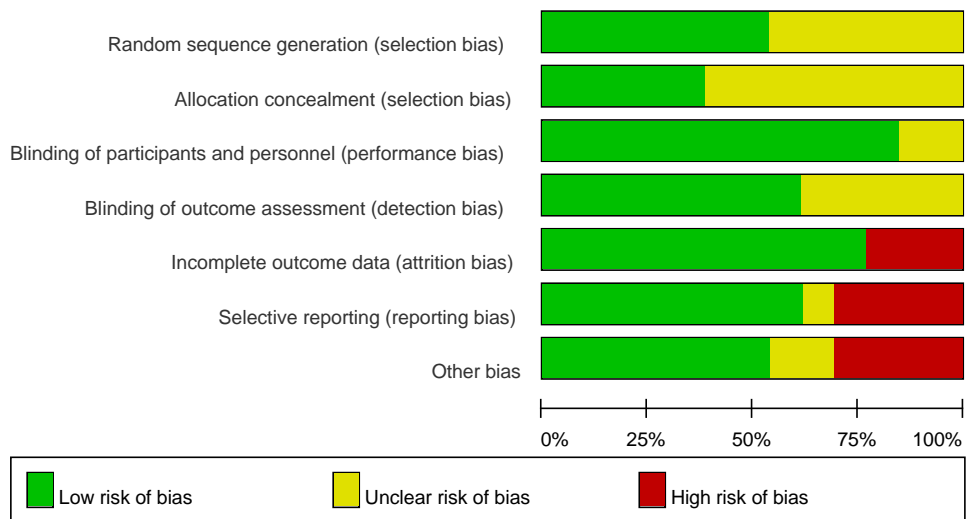



**Supplemental Materials 4 to 7**  
**Results of TBUT**

# Supplemental Material 4

## Sensitivity analysis for high heterogeneity outcome (TBUT)

### Sensitivity analysis for TBUT (Other eye medications were excluded)

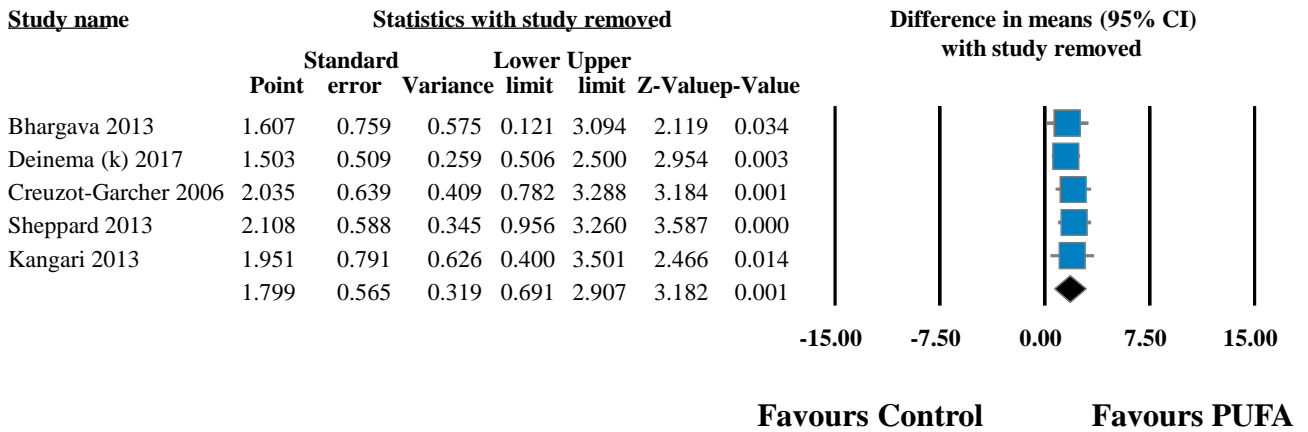

### Sensitivity analysis for TBUT (Other eye medications were continued)

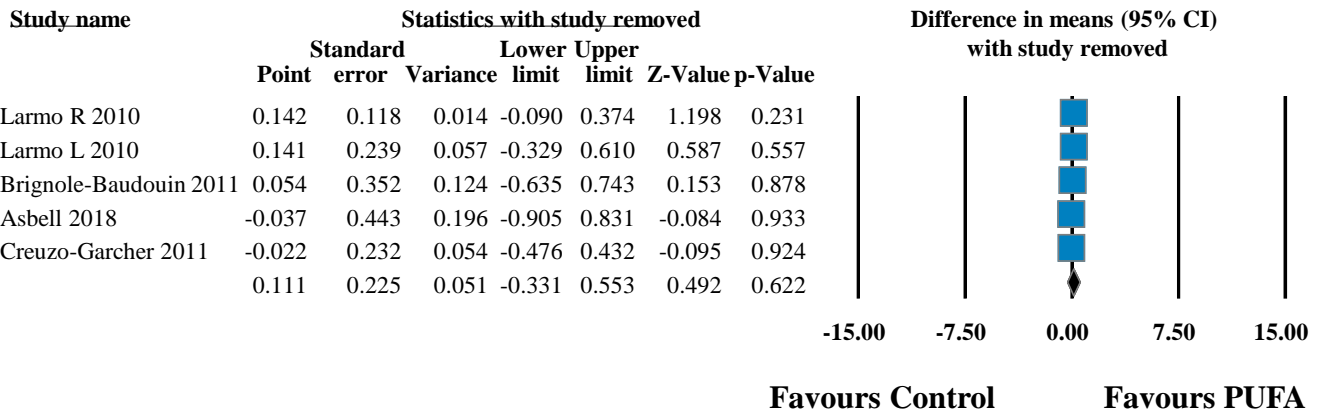

# Supplemental Material 5

## Small study effect test (TBUT)

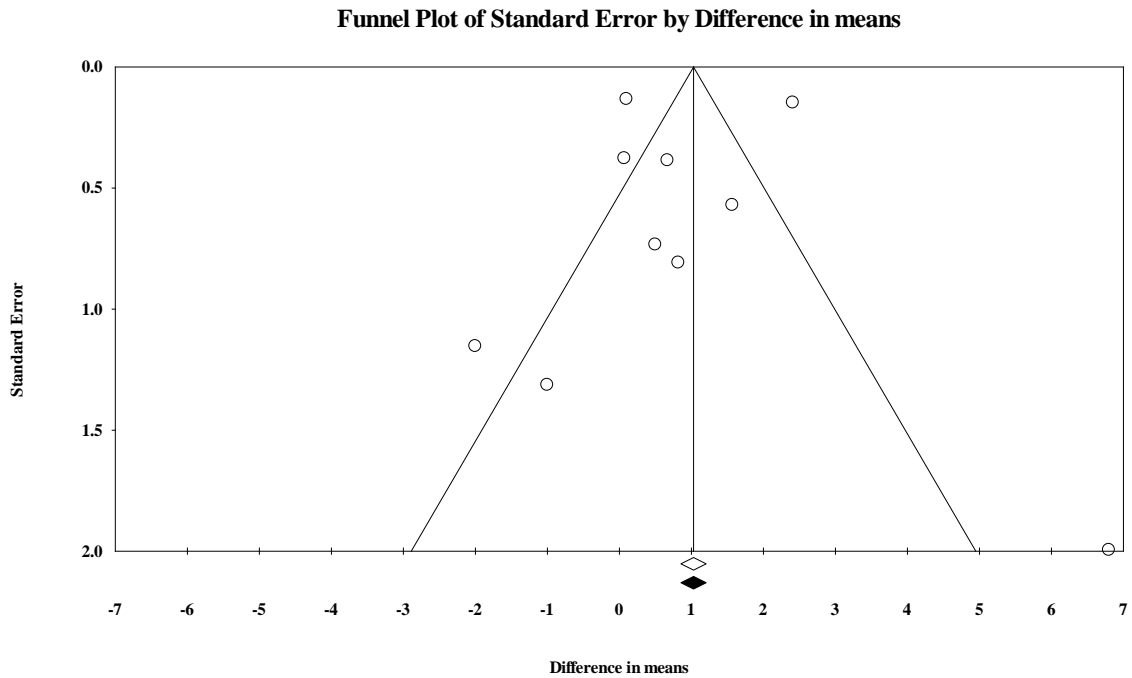

### Egger's regression intercept

|                            |          |
|----------------------------|----------|
| Intercept                  | -0.53142 |
| Standard error             | 2.11010  |
| 95% lower limit (2-tailed) | -5.39733 |
| 95% upper limit (2-tailed) | 4.33448  |
| t-value                    | 0.25185  |
| df                         | 8.00000  |
| P-value (1-tailed)         | 0.40375  |
| P-value (2-tailed)         | 0.80751  |

# Supplemental Material 6

## Meta-regression of treatment duration on TBUT

### Regression of Duration on Difference in means

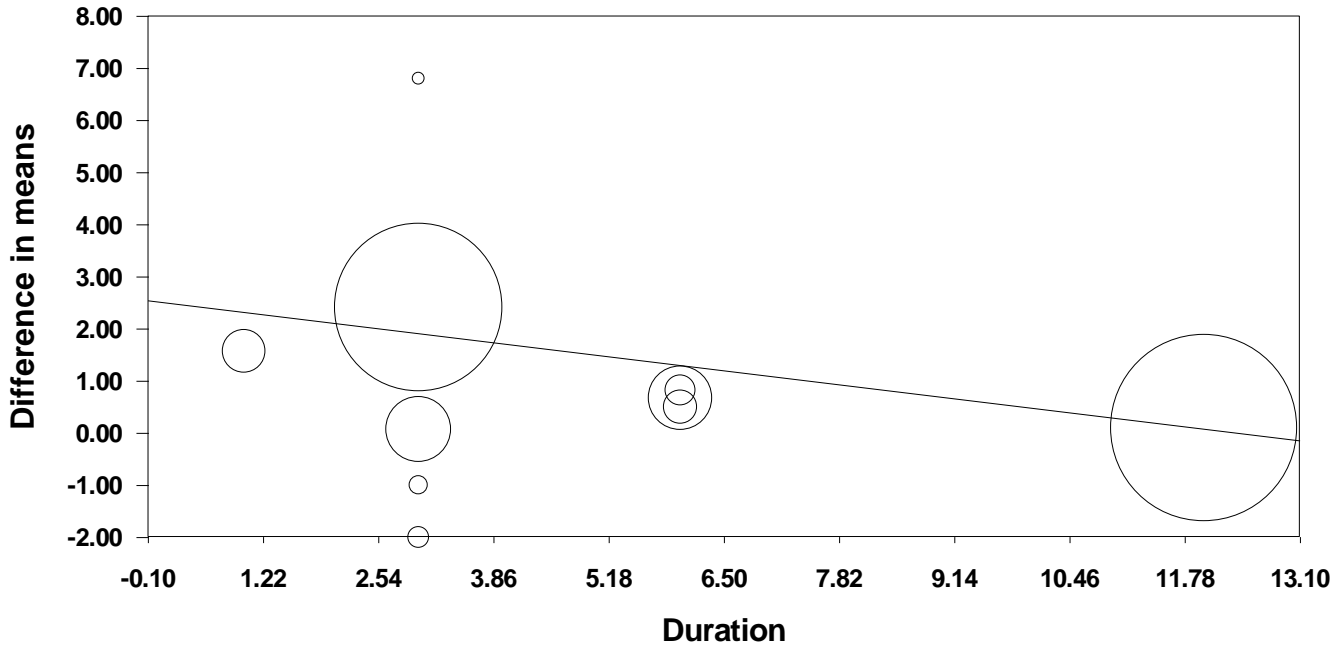

Fixed effect regression

|                    | Point estimate | Standard error | Lower limit | Upper limit | Z-value  | p-Value |
|--------------------|----------------|----------------|-------------|-------------|----------|---------|
| <b>Slope</b>       | -0.20368       | 0.02037        | -0.24360    | -0.16375    | -9.99949 | 0.00000 |
| <b>Intercept</b>   | 2.51559        | 0.17347        | 2.17560     | 2.85557     | 14.50189 | 0.00000 |
| <b>Tau-squared</b> | 1.62202        |                |             |             |          |         |

|                 | Q         | df      | p-value |
|-----------------|-----------|---------|---------|
| <b>Model</b>    | 99.98978  | 1.00000 | 0.00000 |
| <b>Residual</b> | 63.70172  | 8.00000 | 0.00000 |
| <b>Total</b>    | 163.69150 | 9.00000 | 0.00000 |

# Supplemental Material 7

## Meta-regression of single-eye data on TBUT

### Regression of Single-eye-based on Difference in means

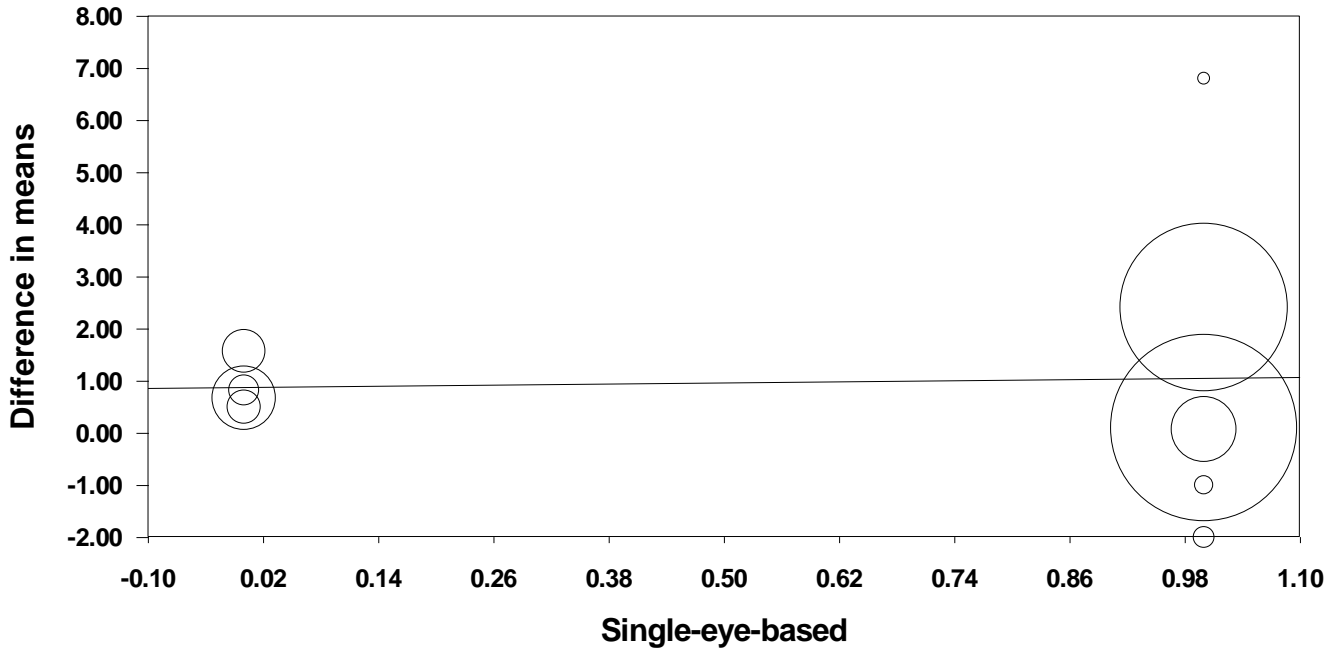

Fixed effect regression

|                    | Point estimate | Standard error | Lower limit | Upper limit | Z-value | p-Value |
|--------------------|----------------|----------------|-------------|-------------|---------|---------|
| <b>Slope</b>       | 0.17454        | 0.29110        | -0.39600    | 0.74508     | 0.59960 | 0.54877 |
| <b>Intercept</b>   | 0.87341        | 0.27530        | 0.33384     | 1.41298     | 3.17262 | 0.00151 |
| <b>Tau-squared</b> | 2.16381        |                |             |             |         |         |

|                 | Q         | df      | p-value |
|-----------------|-----------|---------|---------|
| <b>Model</b>    | 0.35952   | 1.00000 | 0.54877 |
| <b>Residual</b> | 163.33198 | 8.00000 | 0.00000 |
| <b>Total</b>    | 163.69150 | 9.00000 | 0.00000 |

**Supplemental Material 8 to 11**  
**Results of Schirmer test score**

# Supplemental Material 8

## Small study effect test (Schirmer's test)

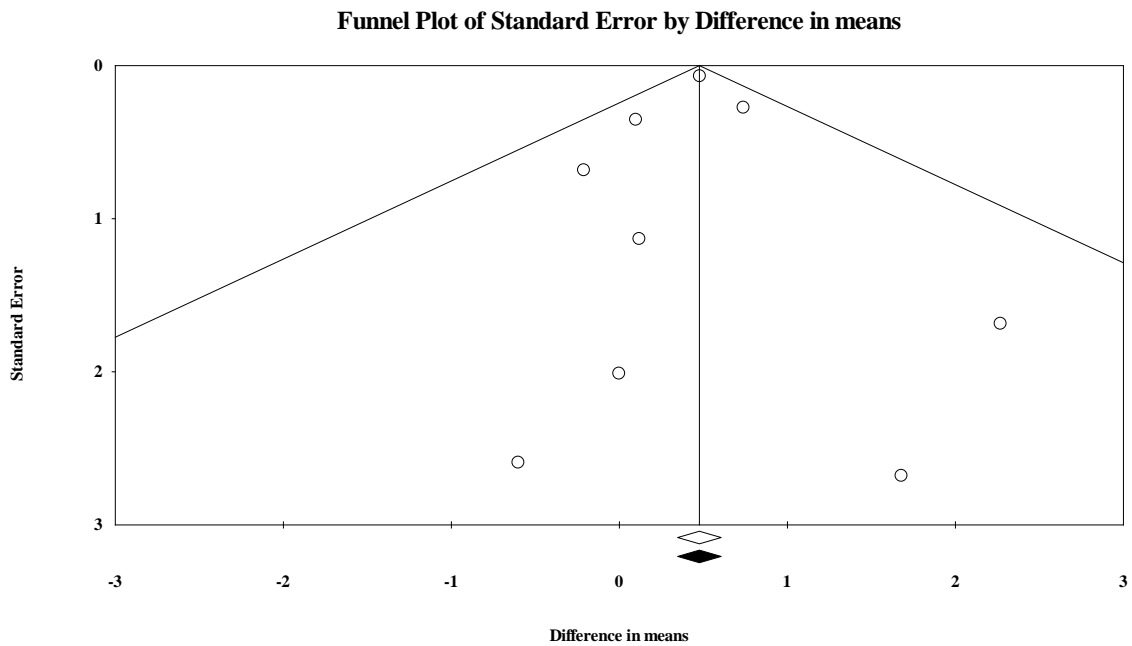

### Egger's regression intercept

|                            |          |
|----------------------------|----------|
| Intercept                  | -0.08101 |
| Standard error             | 0.32572  |
| 95% lower limit (2-tailed) | -0.85121 |
| 95% upper limit (2-tailed) | 0.68919  |
| t-value                    | 0.24871  |
| df                         | 7.00000  |
| P-value (1-tailed)         | 0.40536  |
| P-value (2-tailed)         | 0.81072  |

# Supplemental Material 9

## Meta-regression of treatment duration on Schirmer's test score

**Regression of Duration on Difference in means**

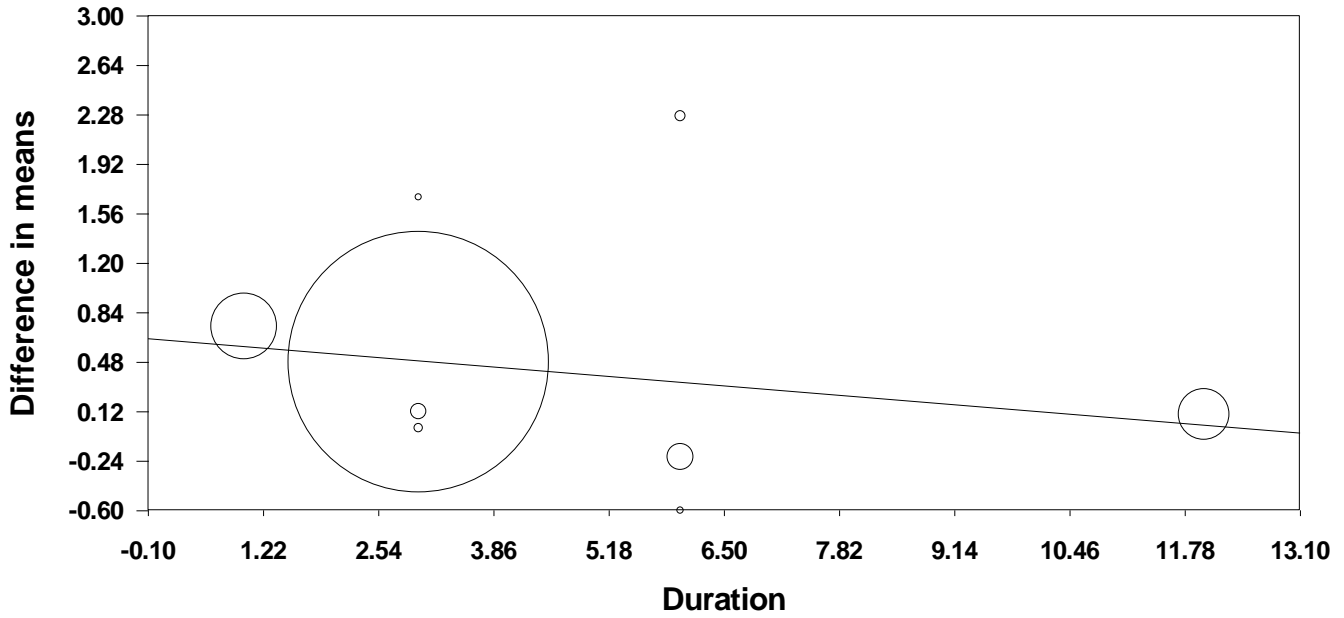

Fixed effect regression

|                    | Point estimate | Standard error | Lower limit | Upper limit | Z-value  | p-Value |
|--------------------|----------------|----------------|-------------|-------------|----------|---------|
| <b>Slope</b>       | -0.05205       | 0.03756        | -0.12567    | 0.02157     | -1.38581 | 0.16580 |
| <b>Intercept</b>   | 0.64459        | 0.13817        | 0.37377     | 0.91540     | 4.66509  | 0.00000 |
| <b>Tau-squared</b> | 0.00000        |                |             |             |          |         |

|                 | Q       | df      | p-value |
|-----------------|---------|---------|---------|
| <b>Model</b>    | 1.92048 | 1.00000 | 0.16580 |
| <b>Residual</b> | 2.79089 | 7.00000 | 0.90365 |
| <b>Total</b>    | 4.71137 | 8.00000 | 0.78793 |



# Supplemental Material 10

## Meta-regression of single-eye data on Schirmer's test score

Regression of Single-eye data on Difference in means

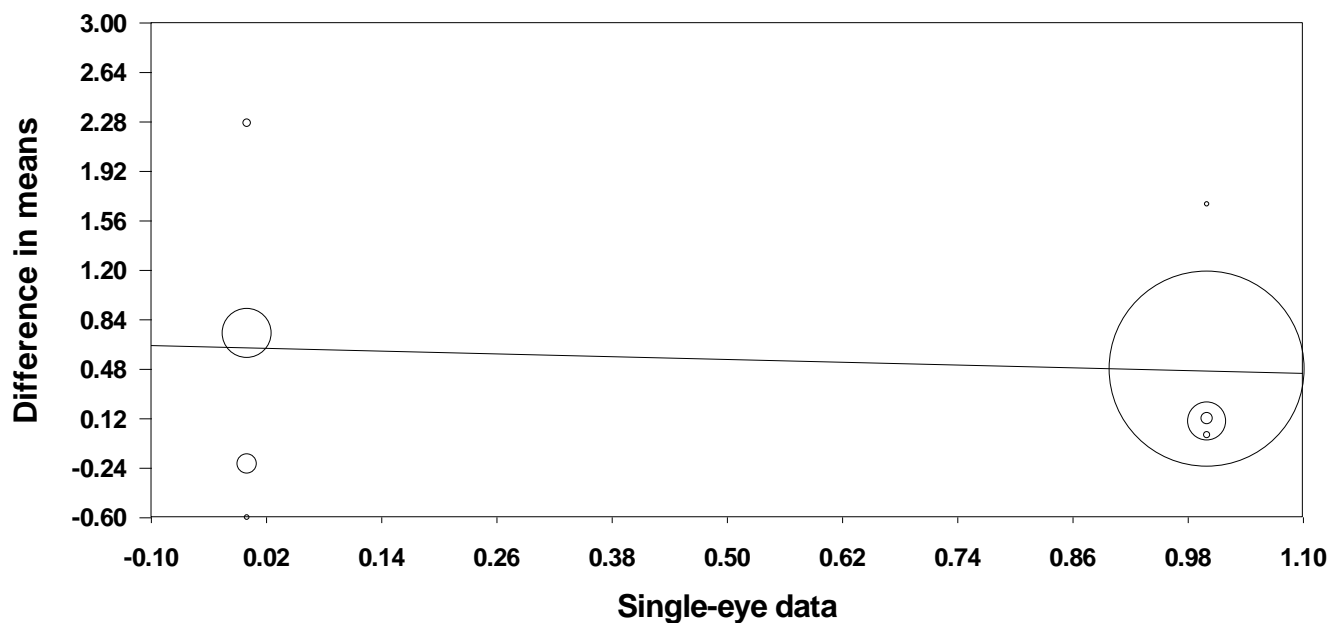

Fixed effect regression

|                    | Point estimate | Standard error | Lower limit | Upper limit | Z-value  | p-Value |
|--------------------|----------------|----------------|-------------|-------------|----------|---------|
| <b>Slope</b>       | -0.16838       | 0.26058        | -0.67911    | 0.34235     | -0.64617 | 0.51817 |
| <b>Intercept</b>   | 0.63314        | 0.25144        | 0.14032     | 1.12596     | 2.51803  | 0.01180 |
| <b>Tau-squared</b> | 0.00000        |                |             |             |          |         |

|                 | Q       | df      | p-value |
|-----------------|---------|---------|---------|
| <b>Model</b>    | 0.41753 | 1.00000 | 0.51817 |
| <b>Residual</b> | 4.29384 | 7.00000 | 0.74538 |
| <b>Total</b>    | 4.71137 | 8.00000 | 0.78793 |

# Supplemental Material 11

## Meta-regression of anesthesia on Schirmer's test score

**Regression of Type of Schimmer's test on Difference in means**

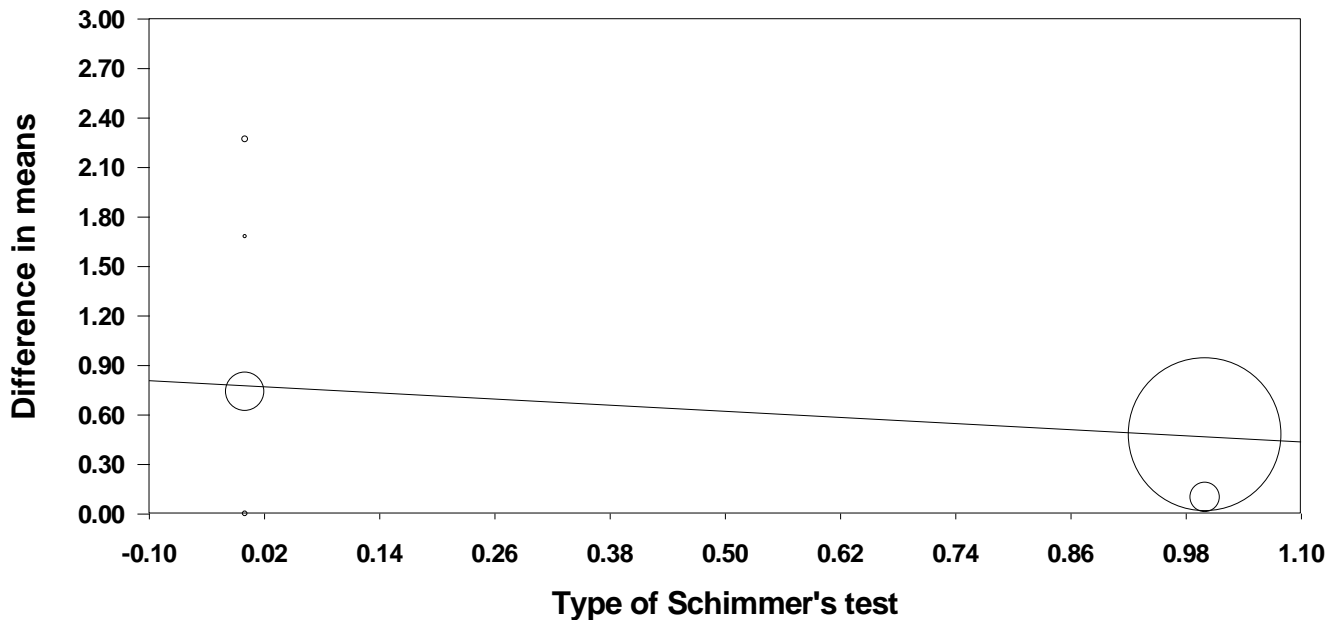

Fixed effect regression

|                    | Point estimate | Standard error | Lower limit | Upper limit | Z-value  | p-Value |
|--------------------|----------------|----------------|-------------|-------------|----------|---------|
| <b>Slope</b>       | -0.30913       | 0.27668        | -0.85141    | 0.23314     | -1.11730 | 0.26386 |
| <b>Intercept</b>   | 0.77490        | 0.26804        | 0.24956     | 1.30025     | 2.89101  | 0.00384 |
| <b>Tau-squared</b> | 0.00000        |                |             |             |          |         |

|                 | Q       | df      | p-value |
|-----------------|---------|---------|---------|
| <b>Model</b>    | 1.24837 | 1.00000 | 0.26386 |
| <b>Residual</b> | 2.16996 | 4.00000 | 0.70453 |
| <b>Total</b>    | 3.41833 | 5.00000 | 0.63578 |

**Supplemental Material 12**  
**Result of Osmolarity**

# Supplemental Material 12

## Small study effect test (Osmolarity)

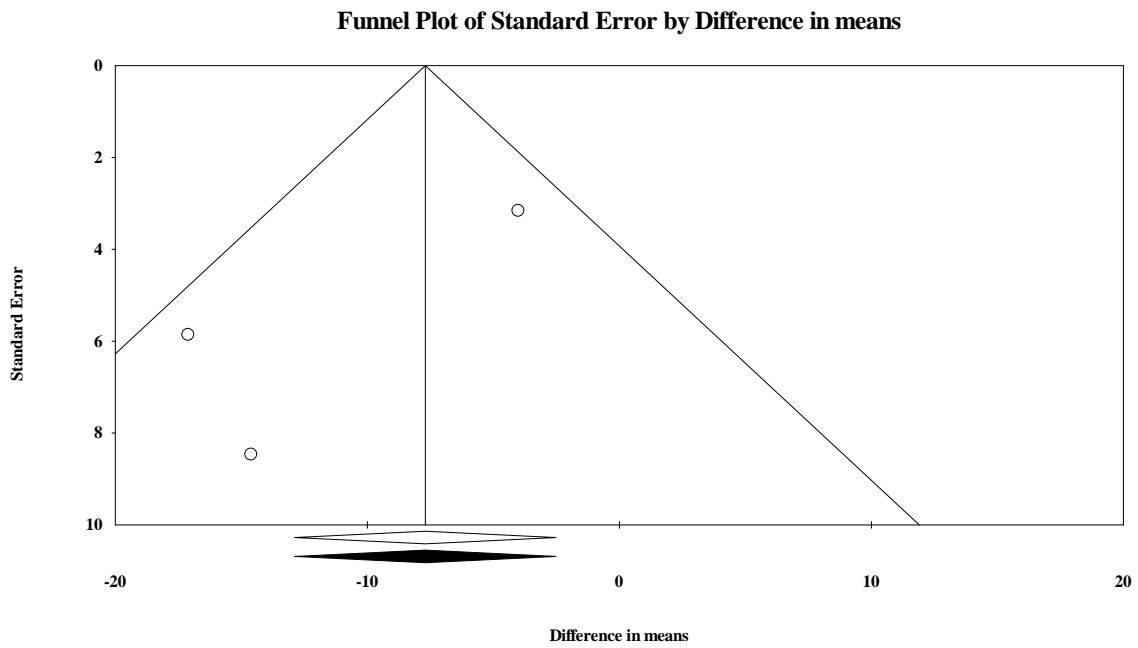

### Egger's regression intercept

|                            |           |
|----------------------------|-----------|
| Intercept                  | -2.82615  |
| Standard error             | 1.55884   |
| 95% lower limit (2-tailed) | -22.63309 |
| 95% upper limit (2-tailed) | 16.98079  |
| t-value                    | 1.81298   |
| df                         | 1.00000   |
| P-value (1-tailed)         | 0.16045   |
| P-value (2-tailed)         | 0.32089   |

**Supplemental Material 13 to 14**  
**Results of OSDI**

# Supplemental Material 13

## Small study effect test (OSDI score)

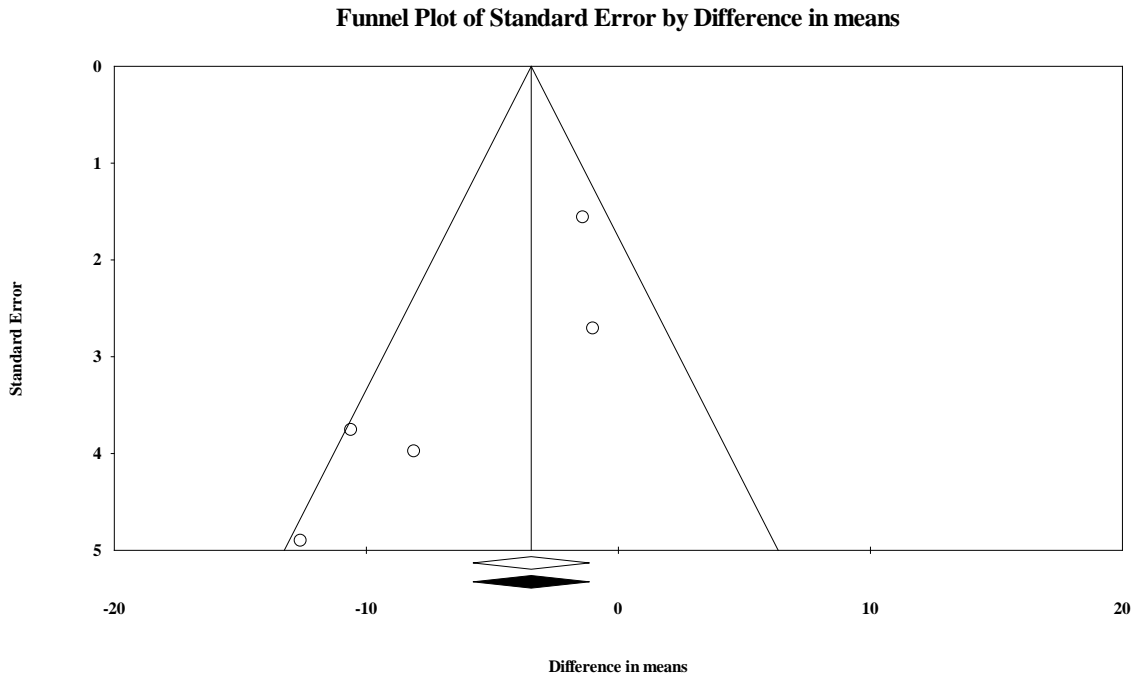

### Egger's regression intercept

|                            |          |
|----------------------------|----------|
| Intercept                  | -3.18359 |
| Standard error             | 0.96981  |
| 95% lower limit (2-tailed) | -6.26995 |
| 95% upper limit (2-tailed) | -0.09723 |
| t-value                    | 3.28271  |
| df                         | 3.00000  |
| P-value (1-tailed)         | 0.02317  |
| P-value (2-tailed)         | 0.04633  |

### Begg and Mazumdar rank correlation

**Kendall's S statistic (P-Q)** -6.00000

### Kendall's tau without continuity correction

|                    |          |
|--------------------|----------|
| Tau                | -0.60000 |
| z-value for tau    | 1.46969  |
| P-value (1-tailed) | 0.07082  |
| P-value (2-tailed) | 0.14164  |

### Kendall's tau with continuity correction

|                    |          |
|--------------------|----------|
| Tau                | -0.50000 |
| z-value for tau    | 1.22474  |
| P-value (1-tailed) | 0.11034  |
| P-value (2-tailed) | 0.22067  |

# Supplemental Material 14

## Meta-regression of treatment duration on OSDI score

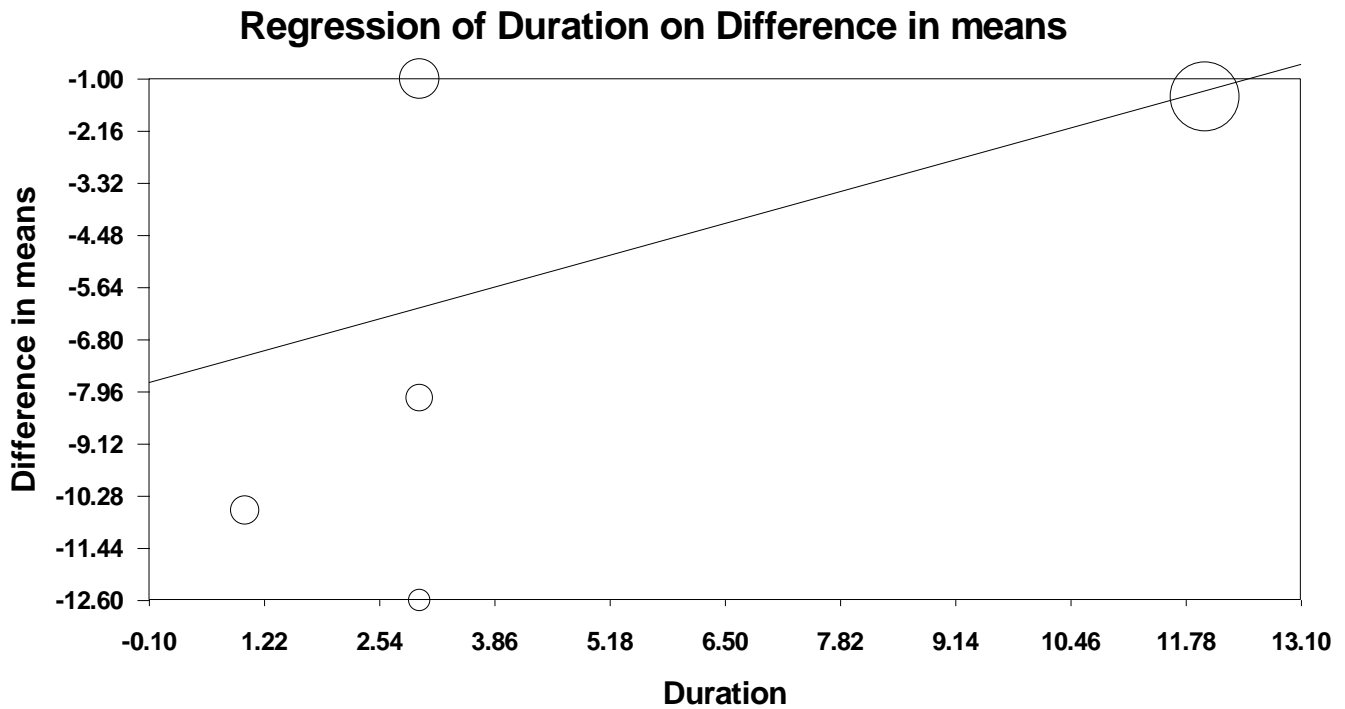

Fixed effect regression

|                    | Point estimate | Standard error | Lower limit | Upper limit | Z-value  | p-Value |
|--------------------|----------------|----------------|-------------|-------------|----------|---------|
| <b>Slope</b>       | 0.53640        | 0.24957        | 0.04725     | 1.02555     | 2.14928  | 0.03161 |
| <b>Intercept</b>   | -7.70513       | 2.29968        | -12.21241   | -3.19784    | -3.35052 | 0.00081 |
| <b>Tau-squared</b> | 15.27261       |                |             |             |          |         |

|                 | Q        | df      | p-value |
|-----------------|----------|---------|---------|
| <b>Model</b>    | 4.61939  | 1.00000 | 0.03161 |
| <b>Residual</b> | 6.39341  | 3.00000 | 0.09396 |
| <b>Total</b>    | 11.01280 | 4.00000 | 0.02642 |
